# Supplementary material for: Biochemical modulation of growth, lipid quality and productivity in mixotrophic cultures of Chlorella sorokiniana
Source: PubMed Central journal article supplement (PMC3725904; doi:10.1186/2193-1801-1-33), 2012-10-06
Supplement: 40064_2012_14_MOESM3_ESM.pdf [file 40064_2012_14_MOESM3_ESM.pdf]

Injection Date : 3/21/2012 9:01:22 PM Seq. Line : 3  
 Sample Name : C FAME *Chlorella sp. BBM + Sodium* Location : Vial 203  
 Acq. Operator : MADHU *Thiosulphate + Trp* Inj : 1  
 Acq. Instrument : Instrument 1 *(4th day)* Inj Volume : 2 µl  
 Acq. Method : C:\HPCHEM\1\METHODS\DB225.M  
 Last changed : 3/21/2012 6:21:29 PM by MADHU  
 Analysis Method : C:\HPCHEM\1\METHODS\DB225.M  
 Last changed : 3/24/2012 11:51:39 AM by SARIKA  
 (modified after loading)

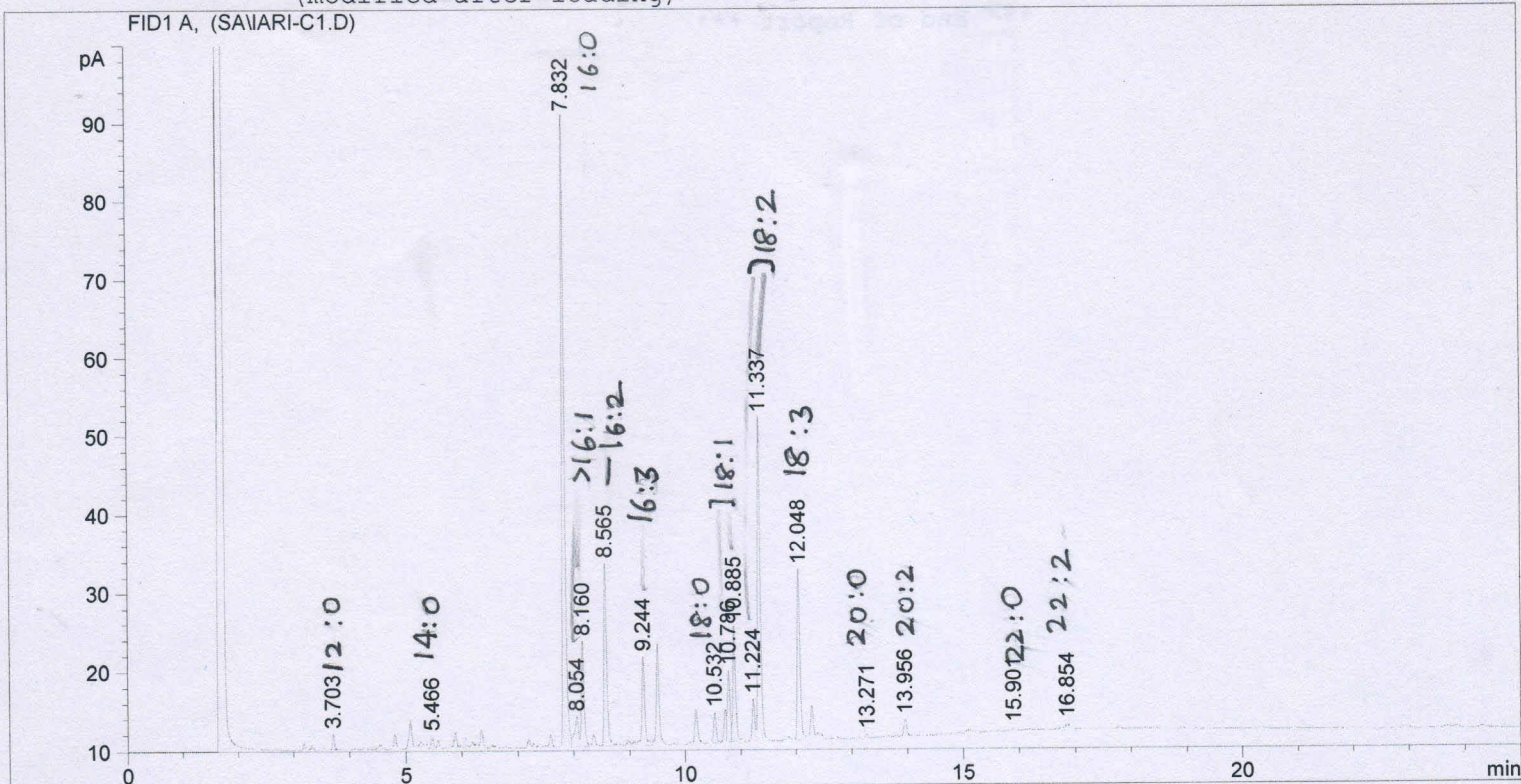

Area Percent Report

Sorted By : Signal  
 Multiplier : 1.0000  
 Dilution : 1.0000  
 Use Multiplier & Dilution Factor with ISTDs

Signal 1: FID1 A,

| Peak # | RetTime [min] | Type | Width [min] | Area [pA*s] | Height [pA] | Area %               |
|--------|---------------|------|-------------|-------------|-------------|----------------------|
| 1      | 3.703         | BB   | 0.0392      | 4.72207     | 1.88892     | 0.59797 <i>12:0</i>  |
| 2      | 5.466         | BV   | 0.0476      | 4.63677     | 1.51998     | 0.58717 <i>14:0</i>  |
| 3      | 7.832         | BV   | 0.0498      | 260.28680   | 80.26655    | 32.96095 <i>16:0</i> |
| 4      | 8.054         | VV   | 0.0714      | 18.27079    | 3.71463     | 2.31369 <i>16:1</i>  |
| 5      | 8.160         | VV   | 0.0510      | 44.28304    | 13.26271    | 5.60770 <i>16:1</i>  |
| 6      | 8.565         | VB   | 0.0509      | 77.16542    | 23.11693    | 9.77170 <i>16:2</i>  |
| 7      | 9.244         | VB   | 0.0570      | 41.00816    | 11.13119    | 5.19299 <i>16:3</i>  |
| 8      | 10.532        | BB   | 0.0489      | 11.90144    | 3.76648     | 1.50712 <i>18:0</i>  |
| 9      | 10.786        | VV   | 0.0502      | 29.22565    | 8.93167     | 3.70094 <i>18:1</i>  |
| 10     | 10.885        | VB   | 0.0507      | 48.05696    | 14.48589    | 6.08561 <i>18:1</i>  |
| 11     | 11.224        | BV   | 0.0514      | 16.83326    | 5.25741     | 2.13165 <i>18:2</i>  |
| 12     | 11.337        | VB   | 0.0546      | 142.76286   | 41.00827    | 18.07852 <i>18:2</i> |
| 13     | 12.048        | BB   | 0.0534      | 76.67740    | 21.62199    | 9.70990 <i>18:3</i>  |
| 14     | 13.271        | BP   | 0.0542      | 1.53435     | 4.44777e-1  | 0.19430 <i>20:0</i>  |
| 15     | 13.956        | BB   | 0.0566      | 7.52102     | 2.05772     | 0.95241 <i>20:2</i>  |

| Peak # | RetTime [min] | Type | Width [min] | Area [pA*s] | Height [pA] | Area %  |
|--------|---------------|------|-------------|-------------|-------------|---------|
| 16     | 15.901        | PP   | 0.0535      | 1.00173     | 2.95821e-1  | 0.12685 |
| 17     | 16.854        | BP   | 0.0775      | 3.79473     | 7.19741e-1  | 0.48054 |

Totals : 789.68246 233.49067

Results obtained with enhanced integrator!

\*\*\* End of Report \*\*\*
